# Supplementary material
Source: Springer Nature journal article supplement (https://www.springermedizin.de/resource/supplementary/12872_2004_48_MOESM1_ESM.pdf/9430904)
Supplement: MOESM1 [file 9430904]

|                                                           | Hospital 1                                              | Hospital 2                                                       |
|-----------------------------------------------------------|---------------------------------------------------------|------------------------------------------------------------------|
| Number of cardiologist (perform angiography)              | 6 (4)*                                                  | 2(2)                                                             |
| AMI case load per year                                    | 257 patients                                            | 249 patients                                                     |
| Guidelines for AMI management                             | Yes                                                     | Yes                                                              |
| Junior doctors                                            | Senior house officers and registrars                    | Senior house officers and registrars                             |
| Catchment population                                      | Approximately 400,000                                   | Approximately 280,000                                            |
| Policy on cardiologist managing AMI                       | To see all patients                                     | To see all patients                                              |
| Follow up by cardiologist                                 | Yes                                                     | Yes                                                              |
| Coronary Care Unit                                        | 6 beds                                                  | 8 beds                                                           |
| Admission route                                           | Via GPs, A & E, paramedical crew, directly to CCU       | Via GPs, A&E, Medical Admissions Ward, general wards, paramedics |
| Other beds for step down                                  | 24 beds                                                 | 15 beds                                                          |
| Use of cardiac enzymes and markers of myocardial necrosis | Yes, including troponin T                               | Yes, including troponin T                                        |
| Policy on exercise testing                                | All patients before discharge except if contraindicated | All patients 3 weeks after MI                                    |
| Policy on echocardiography                                | All patients                                            | All patients                                                     |
| Policy on angiography                                     | Access to all eligible                                  | Access to all eligible                                           |
| Cardiac rehabilitation                                    | Yes offered                                             | Yes offered                                                      |

GP – general practitioners

A & E – accident and emergency department

AMI – Acute Myocardial Infarction

\*Includes academic staff
